# Supplementary material
Source: PubMed Central journal article supplement (PMC282854)
Supplement: plntcell_15_12_3033__1.pdf [file plntcell_15_12_3033__1.pdf]

## Supplementary Figure S1. Reverse transcription (RT) PCR.

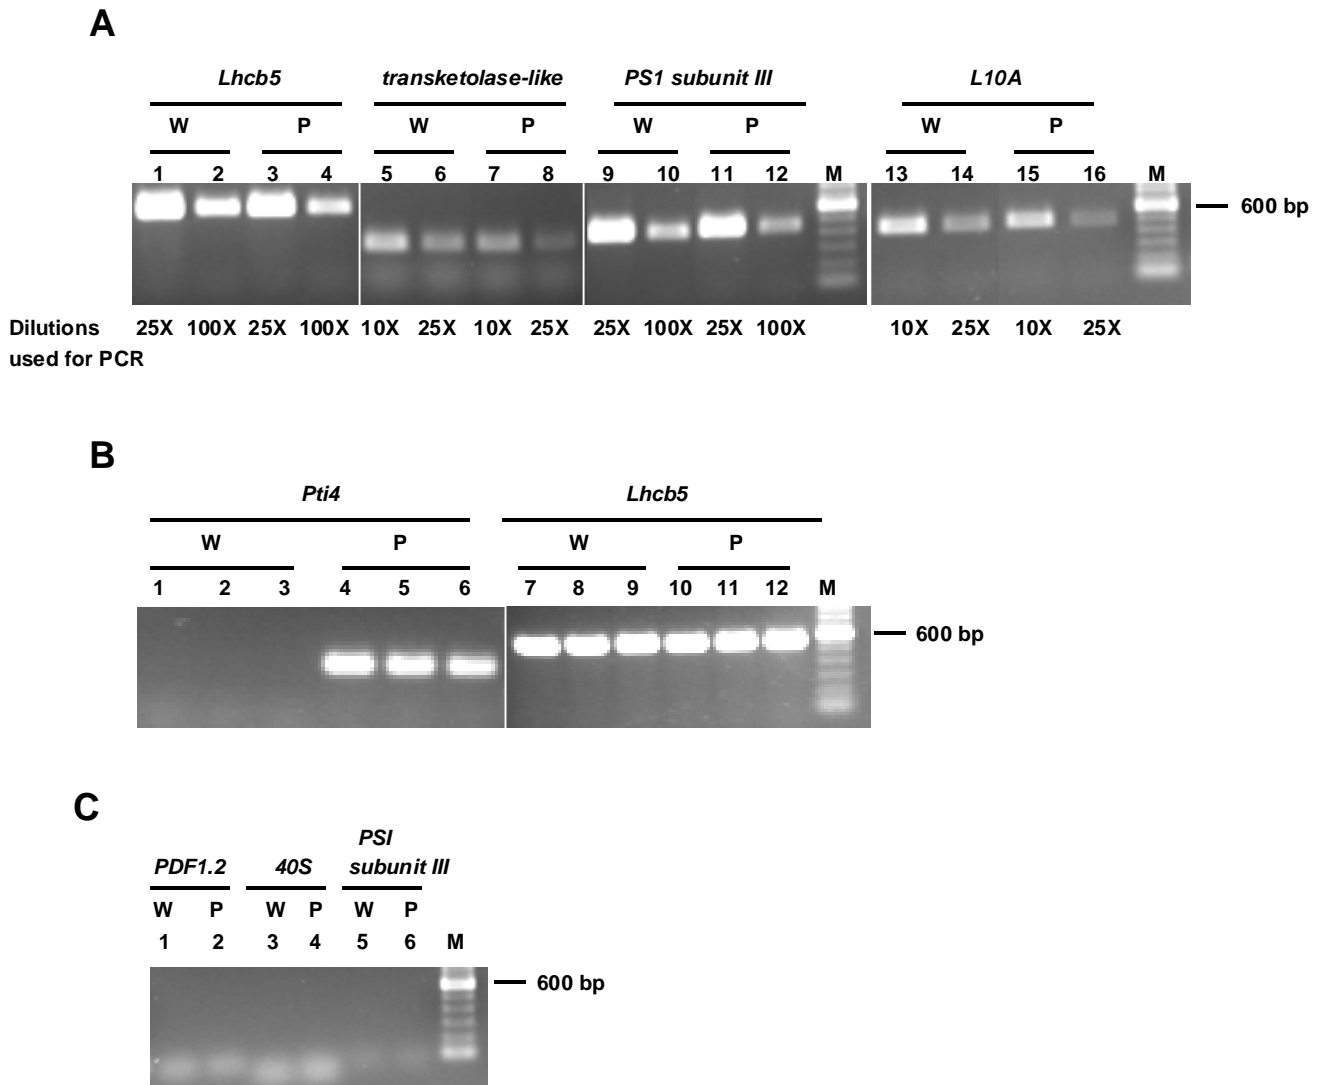

RT PCR was used to verify results obtained from SAGE. The genes corresponding to the PCR products are shown above each panel (for details see Figure 1). PCR products obtained from wild type and *Pti4*-expressing *Arabidopsis* are indicated by W and P respectively. The 100 bp DNA ladder (M) is shown for size comparison. **A: Linear concentration range of PCR for 4 representative genes.** One  $\mu$ l of different dilutions of the reverse transcription (RT) reaction was used to perform PCR with individual gene primer pairs to determine the concentration that corresponded to the linear range of PCR for that primer pair. The dilution used for PCR for each sample is shown below the bands. **B: RT PCR of *Pti4* and control genes.** Triplicate reactions of RT PCR are shown. **C: Negative control to show absence of genomic DNA contamination.** Mock RT reactions were set up in the absence of RT enzyme and PCR was performed with different primers to check for the presence of contaminating genomic DNA.
