# Supplementary material
Source: PubMed Central journal article supplement (PMC282854)
Supplement: plntcell_15_12_3033__3.pdf [file plntcell_15_12_3033__3.pdf]

**Supplementary Table S1.** The 50 most highly abundant transcripts in *Arabidopsis* vegetative tissues.

| SAGE Tag ID <sup>1</sup> | Tag sequence <sup>2</sup> | Tag number <sup>3</sup> |      | Total tags | GenBank Accession   | Corresponding gene <sup>4</sup>                                   |
|--------------------------|---------------------------|-------------------------|------|------------|---------------------|-------------------------------------------------------------------|
|                          |                           | WT                      | Pti4 |            |                     |                                                                   |
| 1                        | CAGGTGTGGC                | 257                     | 287  | 544        | BE039377            | putative rubisco small subunit                                    |
| 2                        | GGCCTTCGCC                | 245                     | 241  | 486        | X03909              | chlorophyll a/b binding protein AB 140                            |
| 3                        | GGAGCTGTTG                | 211                     | 257  | 468        | X64460 <sup>5</sup> | photosystem II type I chlorophyll a/b binding protein             |
| 4                        | AAGGTGTGGC                | 200                     | 146  | 346        | BE039376            | rubisco small subunit 2b                                          |
| 5                        | AGGAGAAAGA                | 162                     | 182  | 344        | T04019              | putative photosystem II type I chlorophyll a /b binding protein   |
| 6                        | AACAAATTTG                | 160                     | 157  | 317        | M63931 <sup>5</sup> | light-harvesting chlorophyll a/b binding protein                  |
| 7                        | CTCGGAGCCC                | 124                     | 162  | 286        | X64460 <sup>5</sup> | putative photosystem II type I chlorophyll a/b binding protein    |
| 8                        | CTTGTGATGG                | 155                     | 111  | 266        | X14212              | rubisco activase                                                  |
| 9                        | GCACAACAAC                | 110                     | 92   | 202        | X56062              | photosystem I chlorophyll a/b binding                             |
| 10                       | GGTTTGGTTG                | 98                      | 96   | 194        | AF134126            | chlorophyll a/b binding protein Lhcb3                             |
| 11                       | CACCTGAACG                | 78                      | 75   | 153        | AA597587            | photosystem I subunit X precursor                                 |
| 12                       | TTTGCGATGC                | 58                      | 62   | 120        | AF134129            | chlorophyll a/b binding protein Lhcb5                             |
| 13                       | AGGCTTGTTT                | 62                      | 54   | 116        | AA597854            | similar to chlorophyll binding protein ( <i>Petunia hybrida</i> ) |
| 14                       | TGGCAACAGT                | 53                      | 62   | 115        | M63931 <sup>5</sup> | light-harvesting chlorophyll a/b binding protein                  |
| 15                       | GTCACCTCCTA               | 61                      | 48   | 109        | X98108.1            | 23 kDa polypeptide precursor psbP of oxygen-evolving complex      |
| 16                       | AAAGTTCTCG                | 41                      | 58   | 99         | U32176.1            | photosystem I reaction centre subunit psaN precursor PSI-N        |
| 17                       | TTTGTACAAA                | 57                      | 37   | 94         | AF134120.1          | chlorophyll a/b binding protein Lhca2                             |
| 18                       | TGCCTCACCA                | 41                      | 49   | 90         | AF446350            | similar to photosystem I subunit XI precursor (Spinach)           |
| 19                       | ATAGAACCTT                | 52                      | 35   | 87         | BE038487            | unknown protein                                                   |
| 20                       | TTCTCTATGT                | 55                      | 32   | 87         | AF134124            | chlorophyll a/b binding protein Lhcb2                             |
| 21                       | AACCCAGCCG                | 43                      | 42   | 85         | AF004393            | salt stress induced tonoplast intrinsic protein                   |
| 22                       | GCAATAGAAG                | 45                      | 39   | 84         | AJ271355            | putative plastocyanin                                             |

|    |            |    |    |    |          |                                                                                   |
|----|------------|----|----|----|----------|-----------------------------------------------------------------------------------|
| 23 | TGTTTTATG  | 42 | 41 | 83 | U01103   | putative photosystem I type III chlorophyll a/b binding protein                   |
| 24 | TCAAATCATT | 47 | 36 | 83 | AV439495 | similar to fructose-bisphosphate aldolase (rice)                                  |
| 25 | TGAGATTCTA | 37 | 45 | 82 | X71878   | chlorophyll a/b binding protein Lhcb4                                             |
| 26 | GGATGACCAC | 37 | 42 | 79 | X75883   | plasma membrane intrinsic protein 2a                                              |
| 27 | AAAGCTTTCT | 46 | 25 | 71 | AJ245629 | putative photosystem I subunit III precursor                                      |
| 28 | ATTCGGAATG | 39 | 30 | 69 | T04005   | putative calcium-binding protein calreticulin                                     |
| 29 | GTTTGAAGGA | 34 | 33 | 67 | BE038725 | similar to translationally controlled tumor protein ( <i>Hevea brasiliensis</i> ) |
| 31 | TTTCTATAAA | 40 | 23 | 63 | X55970   | photosystem II 10 kDa polypeptide                                                 |
| 32 | ACCATCCATC | 31 | 29 | 60 | X65541   | carbonic anhydrase                                                                |
| 33 | TAATGATGTA | 27 | 32 | 59 | AF134127 | chlorophyll a/b binding protein Lhcb4.2                                           |
| 34 | TTGAGACAAA | 33 | 23 | 56 | AF134131 | putative photosystem II 22kDa protein                                             |
| 35 | ACATTAAATT | 20 | 35 | 55 | AA720059 | chlorophyll a/b binding protein CP29                                              |
| 36 | TCCGAATCTT | 22 | 33 | 55 | X98313   | peroxidase prxr1                                                                  |
| 37 | GTGCGTTTGT | 20 | 34 | 54 | AV820031 | putative glycine-rich protein                                                     |
| 38 | TTAATTTTTA | 21 | 33 | 54 | AJ245906 | putative photosystem I reaction center subunit II precursor                       |
| 39 | AGGCAGACCG | 22 | 31 | 53 | X16432   | EF-1 alpha-A4 gene for elongation factor 1-alpha                                  |
| 40 | GGCCTTCGCT | 26 | 26 | 52 | X64459   | photosystem II type I chlorophyll a/b binding protein Lhb1B1                      |
| 41 | ATGATGCGGC | 32 | 20 | 52 | AV550460 | putative chlorophyll a/b binding protein                                          |
| 42 | ATGTTTTTGA | 29 | 21 | 50 | AF134130 | chlorophyll a/b binding protein Lhcb6                                             |
| 43 | TGGAGTCAAT | 21 | 28 | 49 | AF159798 | lipid transfer protein 1                                                          |
| 44 | AACACTGCTG | 29 | 20 | 49 | U17589   | thiamine biosynthesis gene Thi1                                                   |
| 45 | AACGCACACC | 29 | 19 | 48 | AV532739 | chloroplast PSI P700 apoprotein A2                                                |
| 46 | GGCAGGCAAG | 24 | 23 | 47 | AY096798 | 23S ribosomal RNA coding sequence                                                 |
| 47 | GCGAAAAGGA | 21 | 23 | 44 | X58149   | ribulose-5-phosphate kinase                                                       |
| 48 | CCTAAGATCT | 23 | 19 | 42 | X52428   | 33 kDa oxygen-evolving protein                                                    |

|    |            |    |    |    |          |                                                   |
|----|------------|----|----|----|----------|---------------------------------------------------|
| 49 | AAGATGAGGA | 26 | 16 | 42 | T41733   | photosystem II 5 KD protein                       |
| 50 | AGAGTTTGTA | 22 | 19 | 41 | AV535384 | putative glyceraldehyde-3-phosphate dehydrogenase |
| 51 | TGGATCTTCT | 23 | 18 | 41 | X64271.1 | catalase                                          |

<sup>1</sup>The SAGE tag ID corresponding to a particular tag sequence or gene.

<sup>2</sup>The 10 bp SAGE tag sequence, excluding the 5' adjacent Nla III site (CATG).

<sup>3</sup>The number of tags of a particular sequence counted in the WT and Pti4 libraries.

<sup>4</sup>The gene corresponding to a particular tag. Most of the tags corresponded to annotated genes, or to ESTs with an assigned function. In the cases where the ESTs bore similarity to predicted proteins from other organisms, the name of the organism is indicated in parentheses.

<sup>5</sup>Tags #3 and 7 were found on the same gene and tags #6 and 14 were found on the same gene. All 4 tags corresponded to chlorophyll a/b binding genes. We believe that these tags correspond to nearly identical, independent transcripts that belong to a gene family, or could be products of alternate splicing of a single gene.
