# Supplementary material
Source: PubMed Central journal article supplement (PMC282854)
Supplement: plntcell_15_12_3033__4.pdf [file plntcell_15_12_3033__4.pdf]

**Supplementary Table S2.** Analysis of *lPT* and *DPT* promoters. One kb regions upstream of the ATG were examined for the presence of cis elements.

| SAGE tag ID                                                                                                | GenBank Accession | Gene                                                      | Cis element <sup>†</sup> | GCC box<br>GCCGCC | G box<br>CACGTG | DRE box<br>CCGAC           | MYB binding site 1 <sup>2</sup> :<br>GTTAGTT | MYB binding site 2 <sup>2</sup> :<br>(C/A)TCC-(T/A)ACC | MYB binding site 3 <sup>2</sup> :<br>TAAC(C/G)GTT | W box<br>TTGACC | as-1 element<br>TGACG |
|------------------------------------------------------------------------------------------------------------|-------------------|-----------------------------------------------------------|--------------------------|-------------------|-----------------|----------------------------|----------------------------------------------|--------------------------------------------------------|---------------------------------------------------|-----------------|-----------------------|
| <b>Environmental/pathogen response (PR and antimicrobial genes, and drought and salt responsive genes)</b> |                   |                                                           |                          |                   |                 |                            |                                              |                                                        |                                                   |                 |                       |
| 65                                                                                                         | T04323            | antifungal protein PDF1.2                                 |                          | 310               |                 | 666                        | 965                                          |                                                        |                                                   |                 | 445                   |
| 212                                                                                                        | U42724            | chloroplast stromal cyclophilin ROO4                      |                          |                   |                 | 674(-)                     |                                              | 121                                                    |                                                   |                 |                       |
| 243                                                                                                        | X78584            | drought induced D119                                      |                          |                   |                 |                            |                                              | 766                                                    |                                                   |                 |                       |
| 356                                                                                                        | X98189            | peroxidase ATP1a                                          |                          | 981               |                 |                            | 221                                          |                                                        | 783                                               |                 |                       |
| 523                                                                                                        | AF003728          | salt-induced plasma membrane intrinsic protein SIMIP      |                          |                   |                 |                            |                                              |                                                        |                                                   | 845             | 752                   |
| 617                                                                                                        | AV527586          | putative protein, disease resistance protein family (LRR) |                          |                   | 662             |                            |                                              | 611                                                    |                                                   | 648             | 655(-),<br>712(-)     |
| 634                                                                                                        | BE038927          | major latex protein (MLP)-related                         |                          |                   | 948             |                            |                                              |                                                        |                                                   |                 | 114(-)                |
| 642                                                                                                        | AA395048          | thylakoid lumen rotamase                                  |                          |                   |                 | 166                        | 309(-),<br>377(-),<br>404(-), 469            |                                                        |                                                   |                 | 832(-),<br>943(-)     |
| 854                                                                                                        | U01880            | hevein-like protein precursor (PR-4)                      |                          | 616               |                 |                            |                                              |                                                        |                                                   | 533             |                       |
| <b>Signal transduction (transcription factors, kinases, signaling molecules)</b>                           |                   |                                                           |                          |                   |                 |                            |                                              |                                                        |                                                   |                 |                       |
| 347                                                                                                        | AB013886          | transcription factor RAV1                                 |                          |                   | 582             |                            |                                              | 736(-)                                                 |                                                   | 303             |                       |
| 352                                                                                                        | X91259            | similar to putative lectin                                |                          |                   |                 |                            |                                              |                                                        |                                                   | 146             | 649                   |
| 423                                                                                                        | U27698            | putative calreticulin ALCRTL                              |                          |                   | 282             | 175(-)                     |                                              |                                                        |                                                   |                 | 181                   |
| 427                                                                                                        | AJ242970          | general transcription factor BTF3b homolog                |                          |                   | 535             | 293(-)                     |                                              |                                                        |                                                   |                 |                       |
| 503                                                                                                        | AF285106          | CBL-interacting protein kinase CIPK6                      |                          | 159 (-),<br>487   | 527             | 162 (-),<br>213(-),<br>345 |                                              |                                                        |                                                   |                 | 633(-),<br>520(-)     |
| 844                                                                                                        | AA598125          | receptor-protein kinase-like protein                      |                          |                   |                 |                            | 729(-)                                       |                                                        |                                                   |                 | 518(-)                |
| 636                                                                                                        | AV556265          | putative M-type thioredoxin                               |                          |                   |                 |                            | 171, 266                                     |                                                        |                                                   |                 | 438(-),<br>672        |
| 842                                                                                                        | U37697            | glutathione reductase                                     |                          |                   |                 | 786                        | 94                                           |                                                        |                                                   |                 |                       |
| <b>Fatty acid, phospholipid, and isoprenoid metabolism</b>                                                 |                   |                                                           |                          |                   |                 |                            |                                              |                                                        |                                                   |                 |                       |
| 645                                                                                                        | AB007799          | NADH-cytochrome b5 reductase                              |                          |                   |                 |                            | 925                                          |                                                        |                                                   |                 | 246(-)                |
| <b>Energy metabolism and photosynthesis</b>                                                                |                   |                                                           |                          |                   |                 |                            |                                              |                                                        |                                                   |                 |                       |
| 318                                                                                                        | S74719            | sedoheptulose-1,7-bisphosphatase                          |                          |                   | 130             |                            |                                              |                                                        |                                                   |                 |                       |
| 321                                                                                                        | L44582            | vacuolar H <sup>+</sup> -pumping ATPase ava-p2            |                          |                   |                 | 125                        |                                              |                                                        |                                                   |                 | 352(-)                |
| 422                                                                                                        | X97484            | putative phosphate transporter                            |                          |                   |                 |                            | 657(-)                                       |                                                        |                                                   |                 | 781(-)                |

|                                |          |                                                        |        |     |                     |                |     |        |        |                  |
|--------------------------------|----------|--------------------------------------------------------|--------|-----|---------------------|----------------|-----|--------|--------|------------------|
| 640                            | Z29881   | putative fructose 1,6-bisphosphatase                   |        | 194 | 413, 408            |                |     |        |        | 301, 326(-)      |
| 834                            | AA598190 | similar to rubisco activase                            |        | 251 |                     |                |     |        |        | 276              |
| <b>Ribosomal proteins</b>      |          |                                                        |        |     |                     |                |     |        |        |                  |
| 275                            | A1100025 | putative ribosomal protein L18                         |        |     |                     |                |     |        |        |                  |
| 317                            | AA728511 | 60S ribosomal protein L10A                             | 424    |     |                     |                |     |        |        | 354(-), 780(-)   |
| 355                            | AV549039 | 50S ribosomal protein L27                              |        |     |                     |                |     |        | 567(-) | 133, 166         |
| 357                            | BE038325 | ribosomal protein S13 -like                            |        |     |                     | 297(-), 368(-) |     |        |        | 608              |
| 419                            | Y09635   | 50S ribosomal protein L24, chloroplast precursor       | 711(-) |     | 686(-)              |                |     |        |        |                  |
| 506                            | T43594   | 60S ribosomal protein L38-like protein                 |        |     | 636(-)              |                |     |        |        | 920              |
| 511                            | AA597822 | putative 60S ribosomal protein L21                     |        |     |                     |                |     |        |        |                  |
| <b>Protein processing/rate</b> |          |                                                        |        |     |                     |                |     |        |        |                  |
| 635                            | AA712419 | ATP-dependent Clp protease ATP-binding subunit (ClpC1) |        | 685 | 695(-), 748(-), 891 |                |     |        |        |                  |
| <b>Membrane proteins</b>       |          |                                                        |        |     |                     |                |     |        |        |                  |
| 210                            | Y08061   | endomembrane-associated protein                        |        |     |                     |                |     | 992(-) |        | 984, 882         |
| 242                            | AA728495 | water channel - like protein                           |        |     |                     |                |     | 430(-) | 850    |                  |
| <b>Other categories</b>        |          |                                                        |        |     |                     |                |     |        |        |                  |
| 512                            | AF017074 | RNA polymerase I, II and III 16.5 kDa subunit          |        |     |                     |                | 533 |        |        | 710              |
| <b>Unknown proteins</b>        |          |                                                        |        |     |                     |                |     |        |        |                  |
| 425                            | R90105   | unknown protein                                        | 733    | 150 | 436(-), 839         |                |     |        |        | 130(-), 138, 958 |

<sup>1</sup>The presence of a cis-element in a promoter is indicated by its distance in bp from the ATG site. Cis-elements found in the reverse orientation are shown with a (-).

<sup>2</sup>The nomenclature MYB binding sites 1, 2 and 3 has been used here to distinguish between the different sequences (see also Table 3).
