# Supplementary material
Source: PubMed Central journal article supplement (PMC282854)
Supplement: plntcell_15_12_3033__5.pdf [file plntcell_15_12_3033__5.pdf]

**Supplementary Table S3.** Primer sequences used in reverse transcription PCR (RT-PCR). The primers were designed so that they would bind to a unique location in the genome.

| SAGE tag ID | GenBank Accession | Corresponding gene                                | Primer sequence <sup>1</sup>                           |
|-------------|-------------------|---------------------------------------------------|--------------------------------------------------------|
| -           | U89255            | Pti4                                              | F GGATCAACAGTTACCACCG<br>R CGGTGTTTCAGCCGCCGGA         |
| 12          | AF134129          | chlorophyll a/b binding protein Lhcb5             | F AAGCCCATCCACGTTCAAGACT<br>R CAAGGCCTAGAGGATCAAATGGAC |
| 27          | AJ245629          | putative photosystem I subunit III precursor      | F CATGAAAGCTTTCTCCGCCG<br>R GGAAGATGATCCGACTAGCCAAAG   |
| 65          | T04323            | PDF1.2                                            | F ATCACCCCTTATCTTCGCTGC<br>R CAGAAATATGCATGTCATAAAGTT  |
| 91          | AA586203          | transketolase-like protein                        | F ATCACCGTTGAAGCTGTTGTTG<br>R AGCATTTAGCATTACACGAATG   |
| 104         | U41998            | actin2                                            | F GAAATTGTAAGAGACATCAA<br>R GCAACGACCTTAATCTTCATG      |
| 112         | AV559242          | putative glycolate oxidase                        | F GCTGGAGTTAGAAAGGTGCTTC<br>R CTGTGGGAATGTAAGTACATG    |
| 125         | AF097648          | phosphate/triose-phosphate translocator precursor | F CATGTGGTACTTCTTGAATG<br>R GGACCTTCAACGATGATG         |
| 173         | AV536971          | unknown protein*                                  | F AGGCCCCGGAGACTGCTA<br>R GTTTAAACACCACTCCCCTTG        |
| 189         | BT002151          | putative threonine synthase*                      | F CAAAGGGTTTCATATGTG<br>R GTAAACTTCAATCCATGAGC         |
| 208         | AV547952          | putative acetyl-CoA synthetase*                   | F TGTTGGATAGCCACATGA<br>R CAAAGTTCCCCACAACCTGC         |
| 209         | AV554596          | 40S ribosomal protein-like                        | F GGTGCACGTTTGCTACTACCG<br>R CAAGTCTCACCATGAATGATGG    |
| 210         | Y08061            | endomembrane associated protein                   | F CCCTAAGGTGGCTGGTTTGAAG<br>R TGGCGCTGTCGTCGTTGTC      |
| 211         | AI099719          | unknown protein*                                  | F CGCGGATATTCGCAGCAGTG<br>R AAGTCTGCAACCATTCTCATG      |
| 212         | U42724            | chloroplast stromal cyclophilin ROC4*             | F TTACTTTGATGTGGAATTG<br>R CCAAACACGACATGCTTGTTATCT    |
| 242         | AA728495          | water channel-like protein                        | F CCCAATTACTGGAACGGC<br>R TAGAGATCATCACACATGACA        |
| 243         | X78584            | drought induced Di19*                             | F GTATGATATCATCGGGTTGT<br>R ATTCGAATTAGTTCCTCCATGTTT   |
| 244         | AF195896          | Arabinogalactan protein AGP15*                    | F CATGATGGTGATTATCTCCG<br>R TATCCTCATAACAGATATG        |
| 274         | At5g02030         | homeodomain protein*                              | F AGCAGACAGGTCTCTCCAGA<br>R CACTGTTTACATAGCTGTTGTTGT   |
| 275         | AI100025          | putative ribosomal protein L18                    | F GCTTCCACTAAGCAGAAAC<br>R TTCATACACTGCTGTTTCATCG      |
| 317         | AA728511          | ribosomal protein L10A                            | F CATGGATGTTGAGGCTTTG<br>R AAATCCAAACCATATCCC          |
| 318         | S74719            | sedoheptulose biphosphatase                       | F GTTCCTGATGTTAACCAGATTATT<br>R CTAAGCGGTAACCTCAATGG   |
| 352         | X91259            | similar to putative lectin                        | F CTTTCCATGACCCGAGACGA<br>R TTTTCAGGGGCGATGGTAATGGTAT  |
| 355         | AV549039          | 50S ribosomal protein L27*                        | F GTGATTCTCCTGGGCAACGACT<br>R TAAACAAAAAGAGACAAGGAAACT |
| 356         | X98189            | peroxidase ATP1a                                  | F CTTCCCGACCACAACGAGAGT<br>R GTTTGGCAGATTACATTGCTTCC   |
| 357         | BE038325          | ribosomal protein S13 -like*                      | F TGCCGTACAAGCGTTCATCTC<br>R CCCTAAAATCAAATCTCA        |

|     |          |                                                    |                                                          |
|-----|----------|----------------------------------------------------|----------------------------------------------------------|
| 423 | U27698   | putative calreticulin<br>AtCRTL                    | F ACTGCGGGAAATTGGTCTGGTGA<br>R TTGGCGCTGGGGTCCTTGAT      |
| 425 | R90105   | unknown protein                                    | F GACGACGCGATGCTTCCTGAG<br>R TCTTCTTCGAGCGCCAACACAA      |
| 427 | AJ242970 | general transcription factor<br>BTF3b homolog      | F TCCCGCTATTGAAGAAGTT<br>R ATATGTAAAAATCAAAGTGC          |
| 640 | Z29881   | putative fructose 1,6-<br>biphosphatase            | F ATGGTTCTCCTGCAAAGTCTCTGA<br>R AGCTTAGTTCTTCTTTTCCTCCTC |
| 643 | D89051   | drought induced putative<br>sugar transporter ERD6 | F TGTTACCGCCTCTGTTTTCTC<br>R ATGGCACCAATCCGACTACTGT      |
| 645 | AB007799 | NADH-cytochrome b5<br>reductase*                   | F TCAGGGAGATGCGTGTTGGAGA<br>R CCTTGTTCAATGGCGGTGGTC      |
| 648 | AY045836 | unknown protein*                                   | F GGCCGCAAATCCCAATA<br>R ATCTGCCCCGCCCATCA               |
| 842 | U37697   | glutathione reductase                              | F AATTCGTGGCAGATGTCGTCCTAT<br>R ATGTATCCCAACCGTGCTATCAAA |
| 854 | U01880   | hevein-like protein<br>precursor (PR-4)            | F CTAGCGGACCAGGGGAGAGC<br>R ACGCGATCAATGGCCGAAACAAG      |

<sup>1</sup>Sequences of forward (F) and reverse (R) primers are shown.

\* RT-PCR for these genes did not detect differences in transcript abundance or failed to work.
