# Supplementary material
Source: PubMed Central journal article supplement (PMC282854)
Supplement: plntcell_15_12_3033__6.pdf [file plntcell_15_12_3033__6.pdf]

**Supplementary Table S4.** Primer sequences used in chromatin immunoprecipitation.

| SAGE tag ID | GenBank Accession | Corresponding gene                                   | Primer sequence <sup>1</sup>                             |
|-------------|-------------------|------------------------------------------------------|----------------------------------------------------------|
| 65          | T04323            | antifungal protein PDF1.2                            | F CTCCGGTACCAATCGTTTCTTT<br>R CGGCTGCTTCGGCTTTTA         |
| 243         | X78584            | drought induced Di19                                 | F CCGGCGATGGATGATGA<br>R CCCGGTTTGTGGATTGTTTC            |
| 275         | A1100025          | putative ribosomal protein L18                       | F GGGAAAGAAACAACAGGAGGTAT<br>R ATTTGGGATTGTTTTATGTTATGG  |
| 317         | AA728511          | 60S ribosomal protein L10A                           | F TTTTCAAAGCGCTTATGTGGT<br>R AGAGGCGGCTGAAGATTTTAT       |
| 318         | S74719            | sedoheptulose-1,7 biphosphatase                      | F CGGACGTTTGTGGATTTTATTGTT<br>R ACGCTTCCGCTGCACCACTTT    |
| 347         | AB013886          | transcription factor RAV1                            | F CCATTTAACATCGGTAGGA<br>R GCAGGTGCATGGGAAGTA            |
| 352         | X91259            | similar to putative lectin                           | F ACCCCCGAGTTGAGTTATGG<br>R AGGGGCTTAGCAGTGAAATGG        |
| 355         | AV549039          | 50S ribosomal protein L27                            | F CTCTCATCTTGTTCATAATACTT<br>R ACGCCCTTTCGGACCAG         |
| 356         | X98189            | peroxidase ATP1a                                     | F TAATTGTATGTTCCGTTACAGTC<br>R GTCACTCACCCGTCTTTC        |
| 357         | BE038325          | ribosomal protein S13 -like                          | F ATGCGTCTTTGTTGTTCACTTATC<br>R TCTTCCTCGGTTTCTTTCTTACG  |
| 419         | Y09635            | 50S ribosomal protein L24, chloroplast precursor     | F TCTCCGTCGCCGTCTCCAC<br>R CTCGCTCTGCAACTTTCACTCTTC      |
| 422         | X97484            | putative phosphate transporter                       | F CTAACCAGCCTCACCTACCTCA<br>R GATTGCGTTTGGATGCTTCTT      |
| 427         | AJ242970          | general transcription factor BTF3                    | F GCCAATATTATCATCGAGCATCCA<br>R TATACCAAATCCCCCAATCAAACA |
| 503         | AF285106          | CBL-interacting protein kinase CIPK6                 | F GCAAACCTCCGCAACCATAACC<br>R GTCTTCACCGGCGATACTCC       |
| 506         | T43594            | 60S ribosomal protein L38-like protein               | F ATGAGCGGGCGCACCAACC<br>R TAGGCCCATTAATCCGAAAAGTT       |
| 511         | AA597822          | putative 60S ribosomal protein L21                   | F AGCAAGCCACGCATAACAGT<br>R CCAGCCCACAAATAATCAAGA        |
| 523         | AF003728          | salt-induced plasma membrane intrinsic protein SIMIP | F TACCCCACTTTGATTGCTATT<br>R TTAAAGGGGAAAAAGGAAAACC      |
| 854         | U01880            | hevein-like protein precursor (PR-4)                 | F CTCGCCAGCCCAGTCTCT<br>R CTCCGGTGAAAAATGTGTCTAAG        |

<sup>1</sup>Sequences of forward (F) and reverse (R) primers are shown.
